# Supplementary material
Source: Springer Nature journal article supplement (https://www.springermedizin.de/resource/supplementary/12885_2005_495_MOESM2_ESM.pdf/9469620)

**A**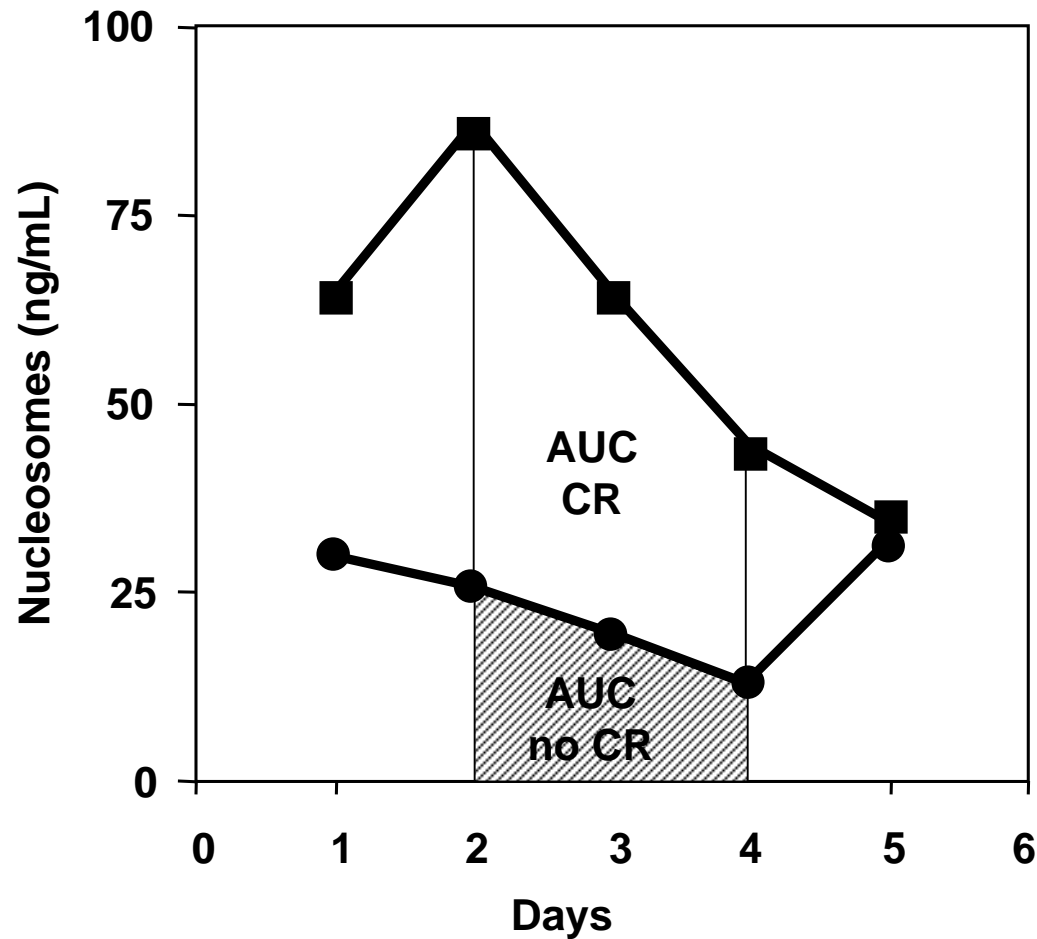**B**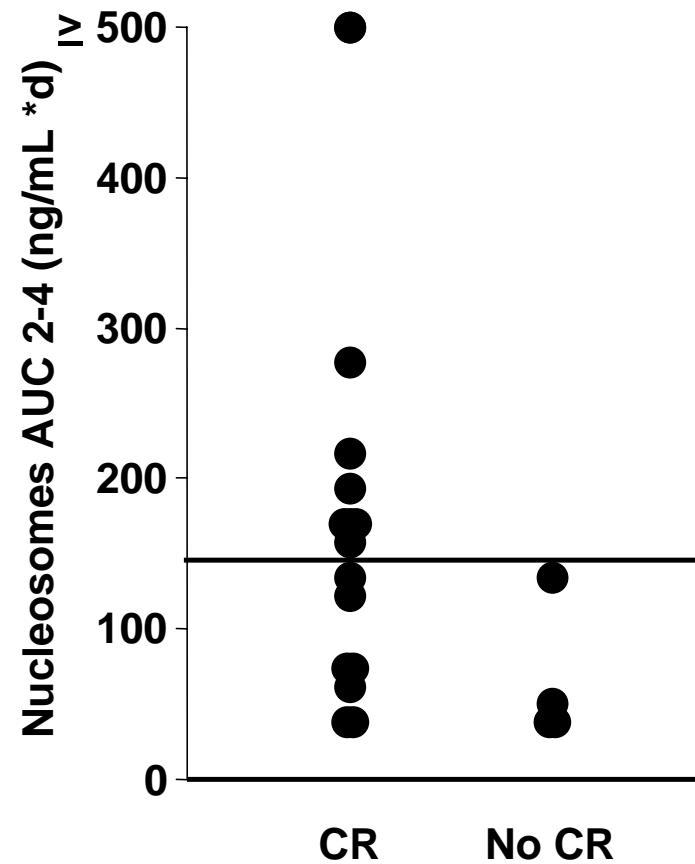

Supplement: MOESM2 [file 9469620]
